# Supplementary material for: Analysis of Prescription Trends for Narcotic Appetite Suppressants: Utilizing the Narcotics Information Management System
Source: PubMed Central journal article supplement — Yonsei Med J. 2024 Jun 4;65(8):480–7. doi: 10.3349/ymj.2023.0335 (PMC11284301; doi:10.3349/ymj.2023.0335), 2024-06-04
Supplement: ymj-65-480-s001.pdf [file ymj-65-480-s001.pdf]

**Supplementary Table 1.** Prescription Trend of Medical Narcotic Appetite Suppressants

| <b>Variables</b>                                 | <b>Total (%)</b> |
|--------------------------------------------------|------------------|
| Number of medical narcotic appetite suppressants | 248443868        |
| Gender                                           |                  |
| Male                                             | 14229750 (5.7)   |
| Female                                           | 234214118 (94.3) |
| Age                                              |                  |
| Under 10 years                                   | 203 (<0.001)     |
| 10 years                                         | 979820 (0.4)     |
| 20 years                                         | 38962389 (15.7)  |
| 30 years                                         | 81149283 (32.7)  |
| 40 years                                         | 80359217 (32.3)  |
| 50 years                                         | 37725390 (15.2)  |
| 60 years                                         | 8718589 (3.5)    |
| 70 years                                         | 526190 (0.2)     |
| Over 80 years                                    | 22793 (<0.01)    |
| Region                                           |                  |
| Seoul                                            | 47020513 (18.9)  |
| Busan                                            | 12324957 (5.0)   |
| Daegu                                            | 20735683 (8.3)   |
| Incheon                                          | 11283967 (4.5)   |
| Gwangju                                          | 5666452 (2.3)    |
| Daejeon                                          | 9699990 (3.9)    |
| Ulsan                                            | 5501606 (2.2)    |
| Sejong-si                                        | 440692 (0.2)     |
| Gyeonggi                                         | 55678088 (22.4)  |
| Gangwon                                          | 7673629 (3.1)    |
| Chungcheongbuk                                   | 9698394 (3.9)    |
| Chungcheongnam                                   | 19393115 (7.8)   |
| Jeollabuk                                        | 7971505 (3.2)    |
| Jellanam                                         | 7835967 (3.2)    |
| Gyeongsangbuk                                    | 6255331 (2.5)    |
| Gyeongsangnam                                    | 18766430 (7.6)   |
| Jeju                                             | 2497570 (1.0)    |
| Medical institution                              |                  |
| Hospital                                         | 3828922 (1.5)    |
| General hospital                                 | 1852071 (0.7)    |
| Nursing hospital                                 | 407976 (0.2)     |
| Clinics                                          | 242211970 (97.5) |
| Others                                           | 142930 (0.1)     |
